# Supplementary material for: Breast carcinomas associated with microglandular adenosis are linked to germline alterations in homologous recombination-deficiency genes
Source: NPJ Breast Cancer. 2025 Jul 22;11:76. doi: 10.1038/s41523-025-00794-z (PMC12280099; doi:10.1038/s41523-025-00794-z)
Supplement: Supplementary file 1 — Supplementary Tables S1-S2 [file 41523_2025_794_MOESM1_ESM.xlsx]

## Sheet: Sheet1
Supplementary Table S1: Detailed Clinicopathologic and Germline Genetic Characteristics of the Cases Included in this Study
Patient	Diagnosis age	Germline pathogenic/likely pathogenic variant	Alteration type	Classfication	Prior cancer history (age)	Family BC history (age)	Clinical presentation	IBC-MGA type	TILs	Surgery	Nottingham grade*	Size (mm)	NACT	LVI	Lymph nodes	N stage	Biomarkers	Adjuvant CT	Adjuvant RT	Local recurrence	Distant metastasis
1	42	BRCA1 c.5153-1G>A	Splicing	Pathogenic	BC (53), TOHGSC (49)	PA (unknown), PC (25)	Palpable mass	IDC-NST	20-49%	BCS	3	11	No	Yes	Negative	0	ER-/HER2-	No	Yes	No	No
2	46	BRCA1 c.181T>G	Missense	Pathogenic	BC (25), TOHGSC (50)	None	Mammographically-detected calcifications	MPMC	< 20%	TM	3	8	No	No	X	X	ER-/HER2-	Yes	No	No	No
3	67	BRCA1 c.5266dup	Frameshift	Pathogenic	None	PA (unknown)	Mammographically-detected mass	IDC-NST	< 20%	BCS	3	23	No	No	Negative	0	ER-/HER2-	Yes	Yes	No	No
4	33	BRCA1 c.798_799delTT	Frameshift	Pathogenic	BC (33), contralateral IDC-NST	M (unknown); MA (unknown); MC (unknown)	Palpable mass	IDC-NST	< 20%	TM	3	15	No	No	Negative	0	ER-/HER2-	Yes	Yes	No	No
5	48	BRCA1 c.798_799delTT	Frameshift	Pathogenic	UC (24)	M (42); MC (34), MGM (50)	Mammographically-detected mass	MPMC	< 20%	TM	3	24	No	No	Negative	0	ER-/HER2-	Yes	No	No	Yes (at 83 months)
6	47	BRCA1 c.3607C>T	Nonsense	Pathogenic	BC (47), synchronous contralateral IDC-NST	M (unknown); MA (unknown); MC (unknown)	Mammographically-detected mass	IDC-NST	> 50%	TM	3	5	Yes	Yes	Positive	1	ER-/HER2-	Yes	No	No	No
7	44	BRCA2 c.4631del	Frameshift	Pathogenic	None	None	Mammographically-detected mass	IDC-NST	< 20%	TM	3	15	Yes	No	Positive	1	ER-/HER2-	Yes	Yes	No	No
8	44	BRCA1 c.3237dup (p.Leu1080ilefs*6)	Nonsense	Likely pathogenic	TOHGSC (44)	M (48); PA (46)	Mammographically-detected mass	IDC-NST	> 50%	TM	3	0	Yes	No	Negative	0	ER-/HER2-	No	Yes	No	No
9	29	BRCA1 c.5266dup	Frameshift	Pathogenic	None	None	MRI-detected non-mass enhancement	IDC-NST	> 50%	TM	3	0	Yes	No	Negative	0	ER-/HER2-	No	No	No	No
10	42	BRCA1 c.5266dup	Frameshift	Pathogenic	None	M (42, 57); MA (52)	Mammographically-detected mass	IDC-NST	< 20%	TM	3	11	No	No	Positive	1mi	ER-/HER2-	Yes	No	No	No
11	45	BRCA1 c.213-11T>G	Splicing	Pathogenic	None	PC (52)	MRI-detected non-mass enhancement	MPMC	< 20%	TM	2	16	No	No	Negative	0	ER-/HER2-	Yes	No	No	No
12	39	BRCA1 c.5266dup	Frameshift	Pathogenic	None	M (unknown); MC (unknown)	MRI-detected non-mass enhancement	BCis-MGA only	X	TM	X	X	No	No	Negative	0	ER-/HER2-	No	No	No	No
13	26	BRCA1 c.5503C>T	Nonsense	Pathogenic	None	PA (35)	Palpable mass	IDC-NST	< 20%	TM	3	62	Yes	No	Positive	3A	ER-/HER2-	N/a	N/a	N/a	N/a
14	48	BRCA1 c.5089T>C	Missense	Pathogenic	None	S (50); MA (35)	MRI-detected non-mass enhancement	MPMC	< 20%	TM	3	14	No	No	X	X	ER-/HER2-	N/a	N/a	N/a	N/a
15	57	BRCA2 c.4037del	Frameshift	Pathogenic	BC (41)	S (45)	Mammographically-detected mass	IDC-NST	< 20%	TM	2	10	No	No	Negative	0	ER-/HER2-	Yes	No	No	Yes, (at 32 months)
16	46	BRCA1 c.5073A>T	Splicing	VUS	None	None	Mammographically-detected mass	MPMC	< 20%	TM	3	55	No	Yes	Negative	0	ER-/HER2-	Yes	Yes	No	No
17	77	Negative	Negative	X	Colon (60)	None	Mammographically-detected mass	IDC-NST	< 20%	BCS	3	11	No	No	Negative	0	ER-/HER2-	Yes	Yes	No	No
18	42	Negative	Negative	X	BC (44)	None	MRI-detected non-mass enhancement	IDC-NST	< 20%	BCS	3	3	No	No	Negative	0	ER-/HER2-	No	Yes	No	No
19	51	Negative	Negative	X	BC (51); Melanoma (unknown); Lung (62)	M (79)	MRI-detected non-mass enhancement	IDC-NST	< 20%	BCS	2	4	No	No	Negative	0	ER-/HER2-	Yes	Yes	No	No
20	47	Negative	Negative	X	None	M (81)	Palpable mass	IDC-NST with acinic cell differentiation	< 20%	BCS	3	23	No	Yes	Positive	1	ER-/HER2-	Yes	Yes	Yes (at 48 months)	Yes (at 58 months)
21	46	Negative	Negative	X	None	M (67)	MRI-detected non-mass enhancement	BCis-MGA only	X	BCS	X	X	Yes	No	Negative	0	ER-/HER2-	No	Yes	No	No
22	61	Negative	Negative	X	None	None	Mammographically-detected mass	IDC-NST	> 50%	BCS	3	24	No	Yes	Positive	1	ER-/HER2-	Yes	Yes	No	Yes (at 27 months)
23	32	Negative	Negative	X	None	None	Palpable mass	IDC-NST	< 20%	TM	1	32	No	No	Negative	0	ER-/HER2-	Yes	No	No	No
24	40	Negative	Negative	X	None	None	Palpable mass	MPMC	< 20%	TM	2	13	Yes	Yes	Negative	0	ER-/HER2-	Yes	Yes	No	No
25	49	Negative	Negative	X	None	PC (unknown)	Palpable mass	IDC-NST	< 20%	TM	3	10	Yes	No	Negative	0	ER-/HER2-	No	Yes	No	No
26	56	Negative	Negative	X	None	M (51); MA (unknown)	Palpable mass	MPMC	< 20%	BCS	3	28	No	No	Negative	0	ER-/HER2-	Yes	Yes	No	No
27	41	Negative	Negative	X	None	PA (51)	Palpable mass	MPMC	< 20%	BCS	3	18	No	No	Negative	0	ER-/HER2-	Yes	Yes	No	No
28	42	Negative	Negative	X	None	None	MRI-detected non-mass enhancement	IDC-NST	< 20%	TM	3	15	Yes	No	Negative	0	ER-/HER2-	Yes	No	No	No
29	54	Negative	Negative	X	None	MGM (unknown)	Mammographically-detected calcifications	BCis-MGA only	X	TM	X	X	No	No	Negative	0	ER-/HER2-	No	No	No	No
30	32	Negative	Negative	X	None	None	Mammographically-detected mass	MPMC	< 20%	BCS	3	8	Yes	No	Negative	0	ER-/HER2-	Yes	Yes	No	No
31	61	Negative	Negative	X	BC (61), synchronous ipsilateral DCIS	M (60)	Palpable mass	IDC-NST	> 50%	BCS	3	11	No	No	Negative	0	ER-/HER2-	Yes	Yes	No	No
32	66	Negative	Negative	X	UC (unknown); Brain (71)	M (63)	MRI-detected mass	MPMC	< 20%	BCS	3	11	No	No	Negative	0	ER-/HER2-	Yes	Yes	No	No
33	56	Negative	Negative	X	None	PC (53)	Palpable mass	IDC-NST	< 20%	BCS	3	10	Yes	No	Negative	0	ER-/HER2-	No	No	No	No
34	43	Negative	Negative	X	None	MC (age uknown)	Mammographically-detected calcifications	BCis-MGA only	X	TM	X	X	No	No	Negative	0	ER-/HER2-	No	No	No	No
35	59	Negative	Negative	X	None	None	Mammographically-detected asymmetry	IDC-NST with acinic cell differentiation	< 20%	BCS	3	2	No	No	Negative	0	ER-/HER2-	No	Yes	No	No
36	46	Negative	Negative	X	None	None	Palpable mass	MPMC	< 20%	BCS	3	38	Yes	No	Negative	0	ER-/HER2-	Yes	Yes	No	No
37	48	PALB2 c.2488delG	Frameshift del	Pathogenic	BC (51)	MA (age unknown	Mammographically-detected mass	IDC-NST	< 20%	TM	2	40	No	Yes	Positive	2	ER-/HER2-	Yes	Yes	No	Yes (at 31 months)
38	46	BARD1 c.1295T>C	Missense	VUS	None	None	Palpable mass	SCMC	< 20%	BCS	3	32	No	No	Negative	0	ER-/HER2-	N/a	N/a	N/a	N/a
Abbreviations: BC, breast cancer; IBC-MGA, invasive breast carcinoma associated with microglandular adenosis; BCis-MGA, breast carcinoma (in situ) associated with microglandular adenosis; TILs, tumor infiltrating lymphocytes; NACT, neoadjuvant chemotherapy; CT, chemotherapy; RT, radiotherapy; VUS, variant of unknown significance; IDC-NST, invasive ductal carcinoma of no special type; TOHGSC, tubo…
*= pre-treatment grade

## Sheet: Sheet2
	Supplementary Table S2: Comparison between germline HRD and sporadic patients
		Germline HRD P/LPV	Sporadic	P value
		(n=16)	(n=22)
	Median age at diagnosis (range)	45 (26-67)	46.5 (32-77)	0.9
	BC-MGA type
	BCis-MGA	1/16 (6%)	3/22 (14%)	0.6
	IBC-MGA	15/16 (94%)	19/22 (86%)	0.6
	Median invasive tumor size, cm (range) †	1.5 (0.8-5.5)	1.8 (0.2-32)	1
	Histologic type
	Ductal NOS	11/15 (73%)	9/19 (47%)	0.2
	Ductal NOS with acinic cell morphology	0/15 (0)	2/19 (11%)	0.5
	Metaplastic carcinoma	4/15 (27%)	8/19 (42%)	0.5
	Nottingham grade*
	2	3/15 (20%)	3/19 (16%)	1
	3	12/15 (80%)	16/19 (84%)
	Lymph node metastasis	5/15 (33%)	2/22 (9%)	0.8
	Tumor-infiltrating lymphocytes
	< 50%	12/15 (80%)	17/19 (89%)	1
	> 50	3/15 (20%)	2/19 (11%)
	Neoadjuvant chemotherapy	5/15 (33%)	6/19 (31%)	1
	Pathologic complete response	2/5 (40%)	0/6 (0%)	0.4
	Adjuvant chemotherapy	10/13 (77%)	14/18 (77%)	1
	Adjuvant radiotherapy	6/13 (46%)	15/18 (83%)	0.5
	Local recurrence	0/13 (0)	1/18 (6%)	1
	Distant metastasis	3/13 (23%)	2/18 (11%)	0.6
	* Pre-treatment histologic grade
	† Untreated tumor size
	Abbreviations: BC-MGA, breast carcinoma associated with microglandular adenosis; IBC-MGA, invasive breast carcinoma associated with microglandular adenosis;
	BCis-MGA, breast carcinoma (in situ) associated with microglandular adenosis; IDC-NST, invasive ductal carcinoma of no special type; LVI, lymphovascular space invasion
